# Supplementary material for: Foveal light and dark adaptation in patients with glaucoma and healthy subjects: A case-control study
Source: PLoS One. 2018 Mar 6;13(3):e0193663. doi: 10.1371/journal.pone.0193663 (PMC5839543; doi:10.1371/journal.pone.0193663)
Supplement: S1 File — Data underlying this study. (XLS) [file pone.0193663.s001.xls]

## Sheet: Blad1
Number	OAG	AGE	SEX	PUPIL2	PUPIL320	VISUAL_ACUITY	MD	5_OR_6.5_LOG_UNIT_CHANGE	Light_605s	Light_635s	Light_665s	Light_695s	Light_725s	Light_755s	Light_785s	Light_815s	Light_845s	Light_875s	Light_905s	Light_935s	Light_965s	Light_995s	Light_1025s	Light_1055s	Light_1085s	Light_1115s	Light_1145s	Light_1175s	Dark_1205s	Dark_1235s	Dark_1265s	Dark_1295s	Dark_1325s	Dark_1355s	Dark_1385s	Dark_1415s	Dark_1445s	Dark_1475s	Dark_1505s	Dark_1535s	Dark_1565s	Dark_1595s	Dark_1625s	Dark_1655s	Dark_1685s	Dark_1715s	Dark_1745s	Dark_1775s	Dark_1805s
1	0	55	1	5.78	3.41	1	NA	1	1.3	9999	2.7	2.5	1.5	1.7	1.7	1.9	1.5	1.5	1.9	2.1	1.7	1.7	1.7	1.7	1.5	2.1	2.1	1.7	-1.3	-1.3	-1.3	-1.3	-1.3	-1.3	0.5	0.5	-0.1	-0.1	0.1	0.3	9999	9999	0.1	-0.3	0.3	0.1	0.1	0.1	0.3
2	0	48	1	5.49	3.26	1	NA	1	1.5	9999	1.5	1.5	1.7	1.5	1.7	1.5	1.5	1.5	1.7	1.3	1.5	1.3	1.3	1.5	1.3	1.5	1.5	1.5	-1.3	-1.3	-1.3	-1.3	-0.3	-0.9	-0.7	-0.5	-0.9	-0.9	-1.1	-0.3	-0.7	-0.7	-0.5	-0.7	0.1	-0.3	-0.1	-0.1	-0.3
3	0	48	0	5.45	3.23	1.2	NA	1	1.3	1.9	1.7	1.7	2.1	2.1	2.5	2.1	1.9	2.1	2.1	2.1	2.1	2.1	2.1	2.1	1.9	1.7	1.9	2.1	-1.3	-1.3	-0.5	-0.5	-0.5	-0.1	-0.7	-0.7	-0.1	-0.1	0.1	-0.1	-0.1	-0.1	-0.1	0.1	0.1	0.1	0.1	0.1	0.5
5	0	60	1	5.77	3.41	1.2	NA	1	1.3	1.5	1.5	1.7	1.5	1.5	2.1	2.1	2.1	2.1	2.3	2.1	2.3	1.5	2.1	2.1	1.5	2.1	2.3	1.5	-1.3	-1.3	-1.3	-1.3	-1.3	-0.5	-0.7	-0.7	-0.3	-0.7	-0.5	-0.5	-0.5	-0.3	-0.7	-0.5	-0.3	-0.5	-0.5	-0.7	-0.7
6	0	56	1	4.48	2.92	1.2	NA	1	1.3	1.5	1.5	9999	1.5	1.5	1.5	1.7	1.5	1.5	1.5	1.9	1.7	1.7	1.5	2.1	1.7	1.9	1.9	1.5	-1.3	-1.3	-0.9	-0.5	-0.5	-0.3	-0.3	-0.5	-0.3	-0.5	-0.3	-0.5	-0.5	-0.3	-0.5	-0.5	-0.3	-0.1	0.1	-0.3	-0.3
7	0	67	0	3.9	2.2	1.2	NA	1	1.3	1.5	1.5	1.9	1.5	9999	1.5	1.5	1.9	9999	1.7	1.5	1.9	1.5	1.5	1.7	1.5	1.7	2.1	1.5	-1.3	-1.3	-1.3	-1.3	-1.1	-1.1	-1.1	-0.7	-0.7	-0.5	-0.5	-0.3	-0.7	-0.7	-0.9	9999	-1.1	-1.1	9999	-1.1	-1.1
8	0	67	0	4.88	2.62	1	NA	1	1.3	1.5	1.5	1.7	1.7	1.5	1.7	1.7	1.5	1.7	1.7	1.7	1.9	1.7	1.9	1.9	1.9	1.7	2.1	1.7	-1.3	-1.3	-1.3	-1.3	-1.3	-1.3	-1.3	-1.3	-1.3	-1.3	-1.3	-0.1	-0.1	-0.1	-0.3	0.1	0.1	0.1	-0.1	0.1	0.1
9	0	60	1	6.08	3.16	1.2	NA	1	1.3	1.3	1.5	1.3	1.7	1.7	2.1	1.5	1.7	1.5	1.5	1.3	1.5	1.5	1.5	1.5	1.3	1.5	1.3	1.5	-1.3	-1.3	-1.3	-0.7	-0.7	-0.7	-0.7	-0.9	-0.7	-0.7	-0.5	-0.5	-0.7	9999	-0.5	-0.5	-0.3	-0.1	-0.3	-0.3	0.1
10	0	61	1	4.62	2.77	1.2	NA	1	1.3	1.5	1.3	1.3	1.3	1.5	1.3	1.7	1.7	1.5	1.3	1.5	1.5	1.7	1.3	1.5	1.5	1.5	1.3	1.5	-1.3	-1.3	-1.3	-0.7	-0.9	9999	-0.7	9999	-0.7	-0.7	9999	9999	9999	-0.3	-0.5	-0.1	-0.3	0.1	-0.1	-0.5	-0.1
11	0	65	1	5.04	3.3	1.6	NA	1	1.3	1.5	1.5	1.7	2.1	1.9	2.3	2.1	1.5	2.1	1.9	2.1	2.1	2.1	2.1	2.1	2.1	1.7	1.5	1.7	-1.3	-1.1	-0.7	-0.7	-0.7	-0.7	-0.3	-0.5	-0.1	-0.5	-0.1	-0.3	0.1	0.1	9999	-0.3	-0.3	-0.3	-0.1	0.1	0.1
12	0	54	0	6	3.04	1.2	NA	1	1.5	1.5	1.5	1.5	1.5	1.5	1.5	1.5	1.5	1.5	1.5	1.5	2.1	2.1	2.1	1.5	1.9	1.5	2.1	2.3	-1.3	-1.1	-0.9	-0.5	-0.7	-0.5	-0.3	-0.1	-0.3	-0.3	-0.3	9999	0.1	-0.3	0.1	0.1	0.1	-0.1	0.1	0.1	0.3
13	0	63	1	5.54	3.38	1.2	NA	1	1.1	1.3	1.5	1.5	1.9	1.5	2.1	2.1	1.5	2.1	2.1	2.1	2.5	2.1	2.1	2.1	2.1	1.5	2.1	1.3	-1.3	-1.3	-1.3	-1.3	-1.3	0.1	-0.7	-0.3	-0.5	-0.7	-0.5	0.1	-0.7	-0.7	9999	-0.7	-0.9	-0.3	-0.5	-0.7	-0.5
14	0	66	0	4.8	2.7	1.2	NA	1	1.3	1.5	1.5	1.5	1.5	1.5	1.7	1.5	2.1	1.5	1.5	1.5	1.5	1.5	1.7	2.1	1.9	2.1	1.5	1.5	-1.1	9999	-0.9	-0.7	-0.7	-0.7	-0.7	-0.7	-0.7	-0.5	-0.7	-0.3	-0.5	-0.5	-0.5	-0.9	-0.3	-0.3	-0.5	9999	-0.7
15	0	45	1	4.68	2.78	1.6	NA	1	1.5	1.5	1.5	9999	1.5	1.5	2.1	1.7	1.9	1.7	2.1	2.1	1.9	2.1	2.1	1.7	1.9	1.9	2.1	2.1	-1.3	-0.9	-0.7	-0.5	-0.5	-0.3	-0.1	-0.1	-0.5	-0.3	-0.5	-0.7	-0.7	-0.5	-0.5	-0.5	-0.3	-0.7	-0.3	-0.3	-0.5
16	0	68	1	4.11	3	1.2	NA	1	0.9	1.3	1.3	1.3	1.5	1.5	1.3	1.3	1.3	1.5	1.5	1.3	1.3	1.3	1.5	1.3	1.3	1.3	1.3	1.5	-1.3	-1.3	-1.3	-1.3	-1.3	-1.3	-1.3	-1.3	-1.3	-1.3	-1.3	-1.3	-1.3	-1.3	-1.3	-1.3	-1.3	-1.3	-1.3	-1.3	-1.3
17	0	56	0	4.77	2.89	1.6	NA	1	1.3	1.5	1.5	1.3	1.5	1.3	1.3	1.5	1.5	1.3	1.5	1.5	1.5	1.5	1.5	1.5	1.5	1.3	1.3	1.5	-1.3	-1.3	-0.9	-0.9	-0.7	-0.9	-0.3	9999	-0.5	-0.9	9999	-0.7	-0.5	-0.7	-0.7	-0.7	-1.1	-1.1	9999	-0.3	-0.3
19	0	50	1	4.1	2.96	1.2	NA	1	1.3	1.3	1.3	1.3	1.5	1.5	1.5	1.5	1.3	2.1	1.5	1.5	1.5	1.5	1.5	1.5	1.5	9999	1.5	1.5	-1.3	-1.3	-1.3	-0.9	-1.1	-0.9	-0.7	0.1	-0.7	9999	9999	-0.9	-0.9	-0.5	9999	-0.5	-0.9	-0.9	-0.9	-0.7	9999
20	0	62	1	4.21	3.04	1.2	NA	1	1.3	1.5	1.5	1.5	1.5	1.7	2.1	2.1	2.1	2.1	1.5	2.1	2.1	2.1	2.1	2.1	1.9	2.1	2.1	2.1	-1.3	-1.3	-1.3	-0.7	-0.7	-0.7	-0.7	-0.3	-0.5	-0.7	-0.9	-0.7	-0.7	-0.3	-0.5	-0.5	-0.7	-0.1	-0.1	0.5	-0.3
21	0	50	0	5.45	3.36	1.2	NA	1	1.5	1.5	2.5	1.5	1.7	1.5	2.1	2.1	1.7	2.1	2.1	1.7	1.7	2.1	2.1	2.1	2.1	2.1	1.7	2.1	-1.3	-0.9	-0.7	-0.5	-0.3	-0.3	-0.3	-0.3	-0.1	-0.1	-0.1	-0.3	-0.1	0.1	-0.1	-0.1	-0.1	0.1	0.1	0.1	0.1
23	0	47	1	3.84	3	1.6	NA	1	1.3	1.5	2.1	2.1	2.1	1.7	2.1	2.1	2.1	1.7	2.1	2.1	1.7	1.5	2.1	2.1	1.9	1.7	1.5	1.9	-1.3	-1.1	9999	-0.7	-0.7	-0.3	9999	-0.1	0.1	0.1	-0.3	0.1	-0.1	0.1	0.1	-0.1	0.3	0.1	-0.3	0.1	-0.3
24	0	40	0	5.16	2.76	1.2	NA	1	1.3	2.5	1.7	2.1	2.1	2.1	2.1	1.7	2.1	2.1	2.1	2.3	2.1	2.5	2.1	2.1	2.1	2.1	2.1	2.1	-1.3	-1.3	-0.3	-0.3	-0.3	-0.3	-0.1	-0.3	-0.1	-0.1	0.1	-0.1	0.1	-0.1	0.3	0.1	0.3	0.3	0.1	0.1	0.1
25	0	49	1	5.2	2.86	1.2	NA	1	1.3	9999	1.9	2.1	1.7	1.7	2.1	2.1	2.1	1.7	2.1	2.1	1.7	1.7	1.7	2.1	1.7	2.1	1.5	2.1	-1.3	-1.3	-1.3	-0.9	-0.7	-0.5	-0.3	-0.7	-0.7	-0.3	-0.5	-0.3	9999	-0.3	-0.3	-0.1	-0.1	-0.3	-0.5	-0.5	-0.1
26	0	63	0	3.19	2.31	1.2	NA	1	1.3	1.3	1.3	1.3	1.3	1.3	1.3	1.3	1.3	1.5	1.5	1.3	1.5	1.7	1.3	1.5	1.7	1.5	1.5	1.5	-1.3	-1.3	-1.3	-1.3	-1.3	-1.3	-1.3	-1.3	-0.7	-0.7	-1.1	9999	-0.7	-0.5	-0.3	-0.7	-0.9	9999	-0.9	-0.7	-0.9
27	0	46	0	6.15	4.39	1	NA	1	1.3	1.5	1.7	2.1	1.7	1.5	2.1	1.7	2.1	1.7	1.5	1.5	1.9	2.1	1.7	1.7	1.9	2.1	1.7	2.1	-1.3	-0.7	-0.7	-0.3	-0.3	-0.3	-0.5	-0.3	-0.3	-0.3	-0.3	-0.5	-0.1	-0.3	-0.1	-0.3	-0.1	0.1	-0.1	0.1	-0.5
28	0	49	1	4.1	2.75	1.2	NA	1	1.3	1.5	1.5	1.5	1.5	1.5	1.5	1.5	1.5	1.5	1.5	1.5	1.5	1.3	1.5	1.3	1.5	1.5	1.5	1.5	-1.3	-1.3	-1.3	-0.7	-0.3	-0.5	-0.3	-0.7	-0.5	-0.5	-0.5	-0.3	-0.3	-0.7	-0.5	-0.5	-0.3	-0.5	-0.3	-0.3	-0.3
29	0	55	1	4.15	3.04	1.6	NA	1	1.3	1.3	1.5	1.5	1.5	1.5	1.5	1.7	1.5	1.5	1.5	1.7	1.5	1.5	1.5	1.7	1.5	1.7	1.5	1.5	-1.3	-0.9	-0.7	-0.7	-0.7	-0.5	-0.3	-0.5	-0.7	-0.5	-0.5	0.1	9999	9999	0.5	9999	-0.3	-0.5	0.1	-0.3	9999
30	0	60	0	5.33	3.04	1.2	NA	1	1.3	9999	1.3	1.5	1.7	1.5	1.7	2.1	1.7	1.5	1.5	1.9	1.7	2.1	2.1	1.5	1.9	1.3	1.5	1.7	-1.3	-1.3	-1.3	-0.9	-0.7	-0.3	-0.5	-0.5	-0.7	-0.5	-0.3	-0.3	-0.7	-0.7	-0.7	-0.3	-0.3	0.1	-0.7	-0.1	-0.3
31	0	59	1	4.5	3.04	1	NA	1	1.3	1.3	1.3	1.3	1.5	1.5	2.1	1.7	1.7	1.5	1.7	1.5	1.5	1.7	1.7	1.5	1.5	1.5	1.9	1.5	-1.3	-1.3	-1.3	-1.3	-1.3	-1.3	-1.1	9999	-1.1	9999	-0.9	9999	-0.5	-0.7	-0.5	-1.1	-0.9	-0.9	-0.7	-0.5	-0.9
32	0	57	0	5.62	3.04	1.2	NA	1	1.3	1.3	1.5	1.7	1.7	1.5	1.7	1.7	1.5	1.9	1.9	1.9	2.1	2.1	2.1	2.1	1.7	2.1	1.9	1.5	-1.3	-1.1	-0.7	-0.7	-0.7	-0.9	-0.9	-0.5	-0.7	-0.3	-0.7	-0.5	-0.7	-1.1	-0.7	-0.7	9999	-0.9	-0.9	-0.7	-0.7
33	0	49	0	5.45	2.96	1.2	NA	1	1.5	1.9	1.9	2.1	2.1	2.1	2.1	2.1	2.1	2.1	2.1	2.3	1.9	1.9	2.1	2.1	2.1	2.1	2.1	1.9	-1.3	-1.3	-1.3	-1.3	-1.3	-1.3	-0.3	0.1	-0.1	-0.1	-0.1	9999	-0.5	-0.3	-0.3	0.1	-0.1	-0.3	-0.3	-0.3	-0.1
34	0	49	1	4.8	3.04	1	NA	1	1.3	1.5	1.3	1.5	1.7	1.7	1.5	2.1	1.5	1.5	1.5	1.5	1.5	1.7	2.1	1.9	1.7	1.5	2.1	1.5	-1.3	-1.3	-1.3	-1.3	-0.9	-0.9	9999	-0.9	-0.9	-1.1	-0.7	9999	-0.9	-0.9	-0.7	-0.7	-0.9	-0.9	9999	-0.7	-0.3
35	0	54	1	6.6	3.75	1	NA	1	1.1	1.5	1.3	1.5	1.5	1.5	1.7	1.3	1.5	1.9	2.1	1.9	1.7	2.1	1.7	2.1	1.5	1.5	1.5	1.5	-1.3	-1.3	-1.3	-1.3	-1.1	-0.9	9999	-0.9	9999	-1.1	-0.7	-0.5	-0.3	-0.7	-0.3	-0.5	-0.3	9999	-0.3	-0.3	-0.1
36	0	59	0	4.65	2.78	1.2	NA	1	1.3	1.5	1.5	1.5	1.5	1.7	1.5	1.9	1.7	1.5	2.1	1.7	2.1	2.1	2.1	1.5	2.1	1.9	2.1	2.1	-1.3	-0.7	-0.5	-0.3	-0.5	-0.3	-0.5	-0.5	9999	-0.7	-0.5	-0.7	-0.7	-0.3	-0.3	-0.7	-0.3	-0.5	-0.3	-0.7	-0.3
37	0	59	1	5.47	3.15	1.2	NA	1	1.1	1.7	1.5	1.5	1.7	1.9	1.5	1.5	1.5	1.5	1.5	1.5	1.3	1.5	1.3	1.5	1.9	1.5	1.5	1.5	-1.3	-1.3	-1.3	-0.7	-0.7	-0.5	0.1	-0.3	-0.5	-0.3	-0.7	-0.3	-0.3	-0.7	9999	-0.3	-0.3	-0.7	-0.5	-0.5	-0.3
38	0	53	1	3.11	3.19	1.2	NA	1	1.5	9999	1.5	1.5	1.5	1.5	1.7	1.9	1.5	1.7	1.5	1.7	1.5	1.7	1.5	1.5	1.5	1.5	1.5	1.5	-1.3	-1.3	-1.3	-1.3	-1.3	-0.7	9999	-0.7	-0.7	9999	9999	9999	-0.9	-0.9	-0.9	9999	9999	-0.7	-0.9	-0.7	-0.9
39	0	48	0	5.1	3.04	1	NA	1	1.3	1.5	1.5	1.5	1.5	1.5	1.5	1.7	1.5	1.5	1.5	1.3	1.3	1.7	1.5	1.3	1.5	1.5	1.5	1.5	-1.3	-1.1	-0.9	-0.7	9999	9999	9999	9999	-0.3	-0.3	-0.3	-0.3	-0.3	-0.1	-0.1	-0.1	-0.1	-0.1	-0.3	-0.1	-0.1
40	0	42	0	5.12	2.63	1.6	NA	1	1.5	2.1	1.7	2.1	2.1	2.1	2.1	1.7	1.7	2.1	2.1	2.1	2.1	2.1	1.7	2.1	1.7	1.7	1.7	2.1	-1.3	-1.3	-0.7	-0.5	-0.5	-0.5	9999	-1.1	-0.3	-0.7	-0.3	-0.7	-0.3	-0.3	-0.3	-0.3	-0.9	-0.3	-0.3	-0.3	-0.3
41	0	69	0	5.25	2.73	1	NA	1	1.3	2.5	1.5	1.5	1.7	1.5	1.9	1.7	2.1	1.5	1.7	2.1	2.1	1.7	2.1	2.1	2.1	2.1	1.5	1.5	-1.3	-1.3	-1.3	-1.3	-1.3	-0.9	-0.7	9999	-0.9	-0.7	-0.7	-0.9	-0.9	-0.5	-0.1	-0.3	9999	-0.5	0.1	9999	0.1
42	0	44	1	4.92	3.04	1	NA	1	1.3	1.5	1.7	1.7	2.1	1.5	1.7	1.5	1.5	2.1	1.7	1.7	1.5	1.7	1.5	1.5	1.5	1.5	1.5	1.7	-1.3	-1.3	-0.9	-0.5	-0.7	-0.7	-0.7	-0.7	-0.9	-0.7	-0.5	-0.5	-0.7	-0.7	-0.7	-0.7	-0.3	-0.5	-0.7	-0.7	-0.5
43	0	57	0	5.29	3.35	1	NA	1	1.3	1.3	1.3	1.3	1.5	1.5	1.5	1.5	1.5	1.5	1.5	1.5	1.5	1.5	1.5	1.5	1.5	2.1	1.5	1.5	-1.3	-1.3	-1.1	-0.7	-0.9	-0.5	-0.7	-0.7	-0.5	-0.5	-0.5	-0.7	-0.5	-0.5	-0.5	-0.5	-0.3	-0.5	-0.5	-0.3	-0.3
44	0	67	0	4.83	2.86	1.6	NA	1	1.3	9999	1.5	2.1	1.9	1.5	1.5	2.3	2.1	2.1	2.1	2.1	2.1	1.7	1.7	2.1	2.1	2.1	2.3	2.1	-1.3	-1.3	-1.1	-0.7	-0.5	-0.3	-0.3	-0.3	-0.3	-0.1	-0.3	-0.5	0.1	-0.3	-0.3	-0.1	0.1	-0.1	0.1	-0.1	-0.1
45	0	65	0	5.51	3.21	1.2	NA	1	1.3	1.5	1.9	2.1	2.1	2.1	2.1	2.1	1.7	2.1	1.5	1.5	2.1	2.1	2.1	2.1	2.1	2.1	1.9	1.7	-1.3	-1.3	-1.3	-0.9	-0.7	-0.7	-0.5	-0.5	-0.3	-0.5	-0.3	-0.1	-0.1	0.1	0.1	0.1	9999	-0.1	-0.1	0.1	0.1
46	0	57	0	4.24	2.75	1.2	NA	1	1.5	1.7	1.7	1.9	1.5	1.9	1.5	2.1	2.1	1.9	2.1	1.5	2.1	1.5	2.1	2.1	2.1	1.7	2.1	2.1	-1.3	-1.3	-0.7	-1.1	-0.5	-0.5	-0.5	-0.5	9999	-0.5	-0.5	-0.5	-0.9	-0.5	-0.5	-0.5	-0.1	-0.5	-0.1	-0.3	-0.3
47	0	46	0	5.55	3.9	1.2	NA	1	1.3	2.1	1.7	2.1	2.1	2.1	2.1	2.1	2.1	2.1	1.7	1.9	1.9	1.3	1.9	2.1	2.1	2.1	1.9	2.1	-1.1	-1.1	9999	-0.5	-0.7	-0.7	-0.7	-0.5	-0.9	-0.7	-0.7	-0.7	-0.7	9999	-0.7	-0.7	-0.3	-0.5	-0.7	-0.3	-0.3
48	0	49	1	5.63	3.37	1.2	NA	1	1.3	1.9	2.1	1.9	2.1	1.5	1.5	1.3	2.1	2.1	1.5	1.5	1.5	1.3	1.5	1.5	1.7	1.5	1.9	2.1	-1.3	-0.9	9999	-0.5	-0.5	-0.5	-0.5	-0.5	-0.7	-0.3	-0.5	-0.5	-0.3	-0.3	-0.3	-0.1	0.1	-0.1	0.1	0.1	0.1
301	0	69	1	6.25	3.58	1	NA	1	1.3	1.7	1.7	1.7	1.7	1.7	1.7	1.5	1.9	1.7	1.7	1.9	1.9	1.7	2.1	1.7	1.9	1.7	1.9	1.5	-1.3	-1.3	-1.3	-1.1	-0.7	-0.3	-0.3	-0.5	-0.5	-0.5	-0.5	-0.3	-0.7	-0.3	-0.3	-0.3	-0.3	-0.5	-0.3	-0.5	-0.5
302	0	72	1	5.87	3.96	1	NA	1	1.1	1.3	1.3	1.3	1.5	1.5	1.5	1.5	1.5	1.5	1.3	1.5	1.5	1.5	1.5	1.3	1.3	1.5	1.3	1.5	-1.3	-1.3	-1.3	-1.3	-1.1	-1.1	-1.1	-1.1	9999	-0.7	9999	-1.1	9999	-1.1	-1.1	-1.1	-0.7	9999	9999	9999	-1.1
303	0	79	1	4.51	3.02	1	NA	1	1.1	1.3	1.5	1.3	1.3	1.3	1.3	1.3	1.3	1.3	1.3	1.3	1.3	1.5	1.3	1.3	1.3	1.5	1.5	1.5	-1.3	-1.3	-1.3	-1.3	-1.3	-1.3	-1.3	-1.3	-1.3	-1.3	-1.3	-1.3	-1.3	-0.7	-0.7	-0.9	-0.7	-1.1	-0.9	9999	-0.7
304	0	73	0	5.53	3.73	1.2	NA	1	1.1	1.3	1.3	1.3	1.3	1.3	1.3	1.3	1.3	1.3	1.3	1.3	1.5	1.5	1.5	1.3	1.5	1.5	1.7	1.5	-1.3	-1.3	-1.3	-1.3	-1.3	-1.3	-1.3	-0.9	-0.7	-0.7	-0.9	-0.7	-0.5	-0.5	-0.7	-0.3	-0.5	-0.5	-0.7	-0.3	-0.1
305	0	76	0	3.84	2.27	1.2	NA	1	1.3	1.3	2.1	1.3	1.5	1.3	1.5	1.3	1.3	1.5	1.5	1.5	1.3	1.5	1.3	1.3	1.3	1.5	2.1	1.5	-1.3	-1.3	-1.3	-1.3	-1.3	-1.3	-1.3	-1.3	-1.3	-1.3	-1.3	-1.3	-1.3	-0.5	-0.3	-0.3	-0.7	-0.7	-0.3	-0.3	-0.7
306	0	81	0	3.82	2.85	1.2	NA	1	1.3	1.3	1.3	1.3	1.3	1.3	1.5	1.5	1.3	1.3	1.5	1.3	1.3	1.5	1.3	1.3	1.3	1.3	1.3	1.3	-1.3	-1.3	-1.3	-1.3	-1.1	-0.7	-0.7	-0.7	-0.3	-0.7	-0.7	-0.7	9999	-0.5	-0.9	-1.1	-1.1	-0.7	-0.5	-0.7	-0.9
201	0	50	1	4.29	2.97	1	NA	2	0.9	1.7	1.3	1.5	1.3	1.5	1.5	1.3	1.3	1.5	1.3	1.5	1.5	1.5	1.3	1.3	1.1	1.5	1.3	1.5	-1.3	-1.3	-1.3	-1.3	-1.3	-1.3	-1.3	-1.3	-1.3	-1.3	-0.5	-0.5	-0.5	-0.5	-0.7	-0.5	-0.7	-0.5	9999	9999	-0.3
202	0	70	0	5.84	3.65	1	NA	2	0.9	9999	1.1	1.7	1.3	1.3	1.3	1.3	1.5	1.3	1.3	1.1	1.5	1.5	1.7	1.5	1.5	1.5	1.3	1.3	-1.3	-1.3	-1.3	-1.3	-1.3	-1.3	-1.3	-1.3	-1.3	-1.3	-1.3	-1.3	-1.3	-1.3	-1.3	-1.3	-1.3	-1.3	-1.3	-1.3	-1.3
204	0	61	1	6.19	3.38	1.2	NA	2	0.3	9999	1.3	1.7	1.3	0.9	1.5	1.5	1.7	1.7	1.3	1.7	1.5	1.3	1.7	1.7	1.5	1.7	1.7	1.7	-1.3	-1.3	-1.3	-1.3	-1.3	-1.3	-1.3	-1.3	-1.3	-1.3	-1.3	-1.3	-1.3	-1.3	-1.3	-1.3	-1.3	-1.3	-1.3	-1.3	-1.3
205	0	46	1	4.96	2.7	1.6	NA	2	1.3	1.5	1.5	1.3	1.3	1.5	1.3	1.3	1.5	1.5	1.3	1.5	1.3	1.5	1.3	1.3	1.3	1.3	1.5	1.5	-1.3	-1.3	-1.3	-1.3	-1.3	-1.3	-1.3	-1.3	-1.3	-1.3	-1.3	-1.3	-0.7	-0.5	0.5	-0.5	-0.7	-0.7	-0.7	-0.7	-0.5
206	0	64	1	4.71	3.46	1.2	NA	2	0.3	1.7	2.1	1.9	2.1	1.9	1.9	1.9	1.7	1.9	1.9	1.9	1.7	1.5	1.9	1.3	1.5	1.5	1.7	1.9	-1.3	-1.3	-1.3	-1.3	-1.3	-1.3	-1.3	-1.3	-1.3	-1.3	-1.3	-1.3	-1.3	-1.3	-1.3	-1.3	-1.3	-1.3	-1.3	-1.3	-1.3
207	0	49	1	6.59	3.76	1.2	NA	2	1.1	1.5	1.7	2.1	1.5	2.1	1.7	1.9	1.5	1.9	1.9	1.7	1.9	1.5	1.3	1.3	1.5	1.5	1.5	1.9	-1.3	-1.3	-1.3	-1.3	-1.3	-1.3	-1.3	-1.3	-1.3	-1.3	-1.3	-1.3	-1.3	-1.3	-1.3	-1.3	-1.3	-1.3	-1.3	-0.9	-1.1
208	0	68	0	5.63	3.36	1	NA	2	1.3	1.7	2.1	2.1	2.3	2.3	2.5	1.9	1.9	1.5	1.5	1.5	1.7	1.5	1.5	1.7	1.5	1.7	1.5	1.7	-1.3	-1.3	-1.3	-1.3	-1.3	-1.3	-1.3	-1.3	-1.3	-1.3	-1.3	-1.3	-1.3	-1.3	-1.3	-1.3	-1.3	-1.3	-1.3	-1.3	-1.3
209	0	42	0	5.21	2.59	1.6	NA	2	1.3	1.7	1.9	1.5	1.3	1.3	1.3	1.3	1.5	1.7	1.3	1.3	1.3	1.5	1.3	1.3	1.3	1.5	1.3	1.5	-1.3	-1.3	-1.3	-1.3	-1.3	-1.3	-1.3	-1.3	-1.3	-1.3	-1.3	-1.3	-1.3	-1.3	-1.3	-1.3	-1.3	-0.7	-0.9	-0.7	-0.9
210	0	64	0	4.14	2.51	1.2	NA	2	1.9	1.7	1.9	1.9	1.7	1.7	1.7	1.7	1.9	1.7	1.7	1.9	1.5	1.9	1.9	1.7	1.5	1.5	1.5	1.3	-1.3	-1.3	-1.3	-1.3	-1.3	-1.3	-1.3	-1.3	-1.3	-1.3	-1.3	-1.3	-1.3	-1.3	-1.3	-1.3	-1.3	-1.3	-1.3	-1.3	-1.3
211	0	64	0	3.48	2.38	1	NA	2	0.9	1.3	1.3	1.3	1.1	1.1	1.3	1.1	1.3	1.1	1.3	1.1	1.3	1.3	1.3	1.3	1.1	1.1	1.3	1.3	-1.3	-1.3	-1.3	-1.3	-1.3	-1.3	-1.3	-1.3	-1.3	-1.3	-1.3	-1.3	-1.3	-1.3	-1.3	-1.3	-1.3	-1.3	-1.3	-1.3	-1.3
212	0	54	1	5.63	3.23	1.2	NA	2	1.5	2.1	2.1	2.1	1.9	1.9	1.7	1.7	1.5	1.7	1.9	1.5	1.7	2.1	1.9	1.7	1.9	1.9	1.7	1.7	-1.3	-1.3	-1.3	-1.3	-1.3	-1.3	-1.3	-1.3	-1.3	-1.3	-1.3	-1.3	-1.3	-1.3	-1.3	-1.3	-1.3	-1.3	-1.3	-1.3	-1.3
213	0	45	0	6.06	2.87	1.2	NA	2	0.9	1.7	1.3	2.1	1.9	1.9	1.9	1.7	1.7	1.3	1.9	1.7	1.7	1.9	1.7	1.7	1.7	1.7	1.9	1.5	-1.3	-1.3	-1.3	-1.3	-1.3	-1.3	-1.3	-1.3	-1.3	-1.3	-1.3	-1.3	-1.3	-1.3	-1.3	-1.3	-1.3	-1.3	-1.3	-1.3	-1.3
214	0	65	1	6.16	3.6	1	NA	2	-1.3	9999	1.7	1.3	1.3	1.9	1.7	1.9	1.7	1.9	1.7	1.7	1.9	1.7	1.9	1.7	2.1	1.3	1.7	1.3	-1.3	-1.3	-1.3	-1.3	-1.3	-1.3	-1.3	-1.3	-1.3	-1.3	-1.3	-1.3	-1.3	-1.3	-1.3	-0.5	-0.5	-0.7	0.9	-0.7	0.5
215	0	66	0	4.53	1.96	1	NA	2	1.7	9999	1.7	1.7	1.5	1.9	1.7	1.7	1.3	1.5	1.5	1.3	1.3	1.3	1.3	1.5	1.3	1.7	1.3	1.3	-1.3	-1.3	-1.3	-1.3	-1.3	-1.3	-1.3	-1.3	-1.3	-1.3	-1.3	-1.3	-1.3	-1.3	-1.3	-1.3	-1.3	-1.3	-1.3	-1.3	-1.1
216	0	49	1	5.38	3.27	1.6	NA	2	-1.3	1.5	1.5	1.5	1.9	1.7	1.5	1.7	1.7	1.7	1.7	1.9	1.5	1.7	1.7	1.7	1.7	1.7	1.5	1.7	-1.3	-1.3	-1.3	-1.3	-1.3	-1.3	-1.3	-1.3	-1.3	-0.5	-0.5	-0.5	-0.7	-0.3	-0.3	-0.3	-0.3	-0.7	-0.7	-0.7	-0.7
217	0	59	1	5.5	3.89	1	NA	2	0.1	1.3	1.7	1.7	1.5	1.5	1.3	1.5	1.7	1.9	1.5	1.7	1.3	1.3	1.7	1.7	2.1	1.7	1.7	1.7	-1.3	-1.3	-1.3	-1.3	-1.3	-1.3	-1.3	-1.3	-1.3	-1.3	-1.3	-1.3	-1.3	-1.3	-1.3	-1.3	-1.3	-1.3	-1.3	-1.3	-1.3
218	0	58	0	5.61	3.05	1	NA	2	1.3	1.5	1.5	1.9	1.3	1.7	1.5	1.7	1.7	1.5	1.7	1.3	1.3	1.7	1.7	1.7	1.5	1.3	1.7	1.5	-1.3	-1.3	-1.3	-1.3	-1.3	-1.3	-1.3	-1.3	-1.3	-1.3	-1.3	-1.3	-1.3	-1.3	-1.3	-1.3	-1.3	-1.3	-1.3	-1.3	-1.3
219	0	55	0	5.89	3.25	1.2	NA	2	1.3	1.3	1.9	1.7	2.1	2.1	1.9	1.7	1.7	1.9	1.9	1.7	1.5	1.9	1.5	1.7	1.5	1.7	1.7	1.3	-1.3	-1.3	-1.3	-1.3	-1.3	-1.3	-1.3	-1.3	-1.3	-1.3	-1.3	-1.3	-1.3	-1.3	-1.3	-1.3	-1.3	-1.3	-1.3	-1.3	-1.3
220	0	69	1	4.06	2.69	1.2	NA	2	1.1	1.7	1.5	1.7	1.3	1.5	1.7	1.7	1.7	1.3	1.3	1.7	1.5	1.9	1.5	1.9	1.3	1.5	1.5	1.3	-1.3	-1.3	-1.3	-1.3	-1.3	-1.3	-1.3	-1.3	-1.3	-1.3	-1.3	-1.3	-1.3	-1.3	-1.3	-1.3	-1.3	-1.3	-1.3	-1.3	-1.3
221	0	49	0	6.13	3.44	1.2	NA	2	0.7	2.5	2.5	1.7	1.9	2.1	1.9	1.9	1.9	9999	1.9	1.9	1.9	1.7	1.9	1.5	1.7	1.7	1.9	1.9	-1.3	-1.3	-1.3	-1.3	-1.3	-1.3	-1.3	-1.3	-1.3	-1.3	-1.3	-1.3	-1.3	-1.3	-1.3	-1.3	-1.3	-1.3	-0.3	-0.5	-0.3
222	0	61	0	5.16	2.97	1	NA	2	1.3	1.3	9999	1.5	1.7	1.7	1.7	1.9	1.9	1.9	1.7	1.9	1.9	1.9	1.9	1.7	1.9	1.9	1.9	1.7	-1.3	-1.3	-1.3	-1.3	-1.3	-1.3	-1.3	-1.3	-1.3	-1.3	-1.3	-1.3	-1.3	-1.3	-1.3	-1.3	-1.3	-1.3	-1.3	-1.3	-1.3
224	0	67	1	5.32	3.17	1	NA	2	1.7	1.5	1.7	1.9	1.3	1.7	1.3	1.5	1.5	1.5	1.5	1.7	1.7	1.3	1.3	1.1	1.3	1.3	1.3	1.3	-1.3	-1.3	-1.3	-1.3	-1.3	-1.3	-1.3	-1.3	-1.3	-1.3	-1.1	0.1	0.5	-1.1	-0.9	-0.5	-0.9		-0.7	-0.7	9999
225	0	66	0	5.62	3.31	1.2	NA	2	1.7	1.7	1.9	1.9	1.7	1.5	1.9	1.7	1.7	1.9	1.7	1.7	1.7	1.7	1.7	1.7	1.5	1.7	9999	1.7	-1.3	-1.3	-1.3	-1.3	-1.3	-1.3	-1.3	-1.3	-1.3	-1.3	-1.3	-1.3	-1.3	-1.3	-1.3	-1.3	-1.3	-1.3	-1.3	-1.3	-1.3
226	0	59	1	6.06	3.54	1.2	NA	2	-1.3	1.3	1.3	1.5	1.3	1.7	1.7	1.7	1.7	1.9	1.9	1.9	1.9	1.5	1.5	1.3	1.7	1.9	1.7	1.7	-1.3	-1.3	-1.3	-1.3	-1.3	-1.3	-1.3	-1.3	-1.3	-1.3	-1.3	-1.3	-1.3	-1.3	-1.3	-1.3	-1.3	-1.3	-1.3	-1.3	-1.3
227	0	66	0	4.09	2.43	1	NA	2	1.3	1.7	1.9	1.7	1.7	1.9	1.7	1.9	1.7	1.9	2.1	1.7	1.5	1.9	1.9	1.9	2.1	1.7	1.9	1.7	-1.3	-1.3	-1.3	-1.3	-1.3	-1.3	-1.3	-1.3	-1.3	-1.3	-1.3	-1.3	-1.3	-1.3	-1.3	-1.3	-1.3	-1.3	-1.3	-1.3	-1.3
228	0	40	0	5.26	2.96	1.2	NA	2	1.3	1.7	1.3	1.5	1.3	1.7	1.7	1.7	1.5	1.9	1.5	1.9	1.3	1.5	1.5	1.7	1.7	1.5	1.7	1.3	-1.3	-1.3	-1.3	-1.3	-1.3	-1.3	-1.3	-1.3	-1.3	-1.3	-1.3	-1.3	-1.3	-1.3	-1.3	-1.3	-1.3	-1.3	-1.3	-1.3	-1.3
229	0	56	1	5.2	2.73	1.2	NA	2	1.7	2.5	2.5	1.7	2.5	2.5	1.9	1.9	1.7	1.5	1.9	1.7	1.7	1.5	1.5	1.7	1.7	1.7	1.7	1.7	-1.3	-1.3	-1.3	-1.3	-1.3	-1.3	-1.3	-1.3	-1.3	-1.3	-1.3	-1.3	-1.3	-1.3	-1.3	-1.3	-1.3	-1.3	-1.3	-1.3	-1.3
230	0	62	1	4.73	2.9	1.2	NA	2	1.5	1.7	1.3	1.7	1.7	1.9	1.9	1.9	1.7	1.7	1.5	1.5	1.7	1.7	1.9	1.5	1.7	1.3	2.5	1.7	-1.3	-1.3	-1.3	-1.3	-1.3	-1.3	-1.3	-1.3	-1.3	-1.3	-1.3	-1.3	-1.3	-1.3	-1.3	-1.3	-1.3	-1.3	-1.3	-1.3	-1.3
231	0	58	0	5.05	2.86	1.2	NA	2	1.3	1.3	1.5	1.7	1.5	1.9	1.7	1.5	1.5	1.5	1.7	1.3	1.7	1.3	1.5	1.5	1.3	1.3	1.7	1.5	-1.3	-1.3	-1.3	-1.3	-1.3	-1.3	-1.3	-1.3	-1.3	-1.3	-1.3	-1.3	-1.3	-1.3	-1.3	-1.3	-1.3	-1.3	-1.3	-1.3	-1.3
232	0	50	1	5.41	3.01	1.2	NA	2	1.3	1.5	9999	1.3	1.3	1.7	1.7	1.9	1.5	1.5	1.7	1.7	1.3	1.7	1.5	1.7	1.5	1.7	1.7	1.5	-1.3	-1.3	-1.3	-1.3	-1.3	-1.3	-1.3	-1.3	-1.3	-1.3	-1.3	-1.3	-1.3	-1.3	-0.3	-0.3	-0.5	9999	9999	9999	9999
233	0	56	1	4.49	2.68	1.6	NA	2	1.3	1.3	1.7	1.5	1.7	1.7	1.7	1.7	1.7	1.7	1.7	1.5	1.5	1.7	1.5	1.7	1.3	1.7	1.7	1.5	-1.3	-1.3	-1.3	-1.3	-1.3	-1.3	-1.3	-1.3	-1.3	-1.3	-1.3	-1.3	-1.3	-1.3	-1.3	-1.3	-1.3	-1.3	-1.3	-1.3	-1.3
234	0	50	0	4.39	3.18	1.6	NA	2	0.7	1.3	1.3	1.9	1.7	1.7	1.7	1.5	1.5	1.3	1.5	1.1	1.5	1.3	1.1	1.5	1.7	1.3	1.3	1.5	-1.3	-1.3	-1.3	-1.3	-1.3	-1.3	-1.3	-1.3	-1.3	-1.3	-1.3	-1.3	-1.3	-1.3	-1.3	-1.3	-1.3	-1.3	-1.3	-1.3	-1.3
235	0	57	1	4.8	2.55	1.2	NA	2	0.9	1.7	1.5	1.7	1.9	1.7	1.7	1.7	1.7	1.7	1.7	1.9	1.5	1.9	1.5	1.9	1.7	1.5	1.7	1.7	-1.3	-1.3	-1.3	-1.3	-1.3	-1.3	-1.3	-1.3	-1.3	-1.3	-1.3	-1.3	-1.3	-1.3	-1.3	-1.3	-1.3	-1.3	-1.3	-1.3	-1.3
236	0	57	0	4.29	2.27	1.2	NA	2	1.5	9999	1.7	1.9	1.7	1.7	1.5	1.7	1.7	1.5	1.7	1.5	1.7	1.3	1.3	1.3	1.5	1.3	1.3	1.5	-1.3	-1.3	-1.3	-1.3	-1.3	-1.3	-1.3	-1.3	-1.3	-1.3	-1.3	-1.3	-1.3	-1.3	-1.3	-1.3	-1.3	-1.3	-1.3	-1.3	-1.3
237	0	46	1	6.59	3.85	1	NA	2	-1.3	1.1	1.3	1.5	1.5	1.3	1.9	1.5	1.3	1.5	1.5	1.7	1.7	1.5	9999	1.7	1.7	1.5	1.5	1.5	-1.3	-1.3	-1.3	-1.3	-1.3	-1.3	-1.3	-1.3	-1.3	-1.3	-1.3	-1.3	-1.3	-1.3	-1.3	-1.3	-1.3	-1.1	-0.7	9999	9999
238	0	45	1	4.69	4.09	1.2	NA	2	1.5	2.1	2.1	2.1	2.5	1.7	1.9	1.7	1.9	1.9	1.9	1.7	1.3	1.7	1.7	1.9	1.7	1.7	1.7	1.7	-1.3	-1.3	-1.3	-1.3	-1.3	-1.3	-1.3	-1.3	-1.3	-1.3	-1.3	-1.3	-1.3	-1.3	-1.3	-1.3	-1.3	-1.3	-1.3	-1.3	-1.3
239	0	57	0	6.16	3.24	1	NA	2	1.1	9999	1.7	1.5	1.3	1.3	1.7	1.7	1.7	1.7	1.5	1.7	1.7	1.5	1.3	1.3	1.3	1.5	1.1	1.3	-1.3	-1.3	-1.3	-1.3	-1.3	-1.3	-1.3	-1.3	-1.3	-1.3	-1.3	-1.3	-1.3	-1.3	-1.3	-1.3	-1.3	-1.3	-1.3	-1.3	-1.3
240	0	41	1	5.22	3.03	1.2	NA	2	1.5	1.5	1.3	1.7	1.5	1.7	1.7	1.7	1.9	1.7	1.7	1.7	1.5	1.5	1.7	1.5	1.7	1.7	1.9	1.5	-1.3	-1.3	-1.3	-1.3	-1.3	-1.3	-1.3	-1.3	-1.3	-1.3	-1.3	-1.3	-1.3	-1.3	-1.3	-1.3	-1.3	-1.3	-1.3	-1.3	-1.3
241	0	48	0	5.82	3.59	1.2	NA	2	1.3	9999	2.1	2.1	1.9	2.1	1.5	1.7	1.7	1.7	1.7	1.9	1.7	2.1	1.7	1.7	1.7	1.7	1.7	1.7	-1.3	-1.3	-1.3	-1.3	-1.3	-1.3	-1.3	-1.3	-1.3	-1.3	-1.3	-1.3	-1.3	-1.3	-1.3	-1.3	-1.3	-1.3	-1.3	-1.3	-1.3
242	0	57	0	3.69	2.04	1.2	NA	2	1.5	1.3	1.7	1.5	1.5	1.5	1.5	1.7	1.5	9999	1.5	1.7	1.3	1.9	1.3	1.3	1.7	1.3	1.5	1.1	-1.3	-1.3	-1.3	-1.3	-1.3	-1.3	-0.1	-0.5	-0.3	-0.7	-0.5	-0.7	-0.5	9999	0.9	0.9	-0.7	-0.7	-0.3	-0.5	-0.3
243	0	62	1	4.78	2.76	1.2	NA	2	1.3	1.5	1.7	1.9	1.7	1.7	1.7	1.7	1.9	1.9	1.9	2.1	1.7	1.7	1.7	1.5	1.9	1.9	1.7	1.9	-1.3	-1.3	-1.3	-1.3	-1.3	-1.3	-1.3	-1.3	-1.3	-1.3	-1.3	-1.3	-1.3	-1.3	-1.3	-1.3	-1.3	-1.3	-1.3	-1.3	-1.3
244	0	62	0	4.97	2.71	1	NA	2	1.7	2.5	2.5	1.9	1.7	1.9	1.7	1.7	1.7	1.7	1.5	1.5	1.5	1.5	1.7	1.7	1.5	1.7	1.5	1.7	-1.3	-1.3	-1.3	-1.3	-1.3	-1.3	-1.3	-1.3	-1.3	-1.3	-1.3	-1.3	-1.3	-1.3	-1.3	-1.3	-1.3	-1.3	-1.3	-1.3	-1.3
245	0	66	1	5.27	3.72	1.6	NA	2	1.1	9999	1.9	1.9	1.9	1.3	1.5	1.7	1.9	1.9	1.9	1.9	1.9	1.9	1.7	1.7	1.9	1.7	1.5	1.7	-1.3	-1.3	-1.3	-1.3	-1.3	-1.3	-1.3	-1.3	-1.3	-1.3	-1.3	-1.3	-1.3	-1.3	-1.3	-1.3	-1.3	-1.3	-1.3	-1.3	-1.3
246	0	40	0	5.83	3.09	1.2	NA	2	1.7	1.9	9999	1.7	9999	1.7	1.9	1.9	1.9	1.9	1.9	2.1	1.9	1.9	1.7	2.1	1.9	1.7	1.7	1.9	-1.3	-1.3	-1.3	-1.3	-1.3	-1.3	-1.3	-1.3	-1.3	-1.3	-1.3	-1.3	-1.3	-1.3	-1.3	-1.3	-1.3	-1.3	-1.3	-1.3	-1.3
247	0	46	1	5.81	2.87	1.6	NA	2	1.3	1.7	2.1	1.7	1.3	1.5	1.3	1.5	1.5	1.7	1.7	1.7	1.7	1.7	1.3	1.3	1.7	1.5	1.5	1.5	-1.3	-1.3	-1.3	-1.3	-1.3	-1.3	-1.3	-1.3	-1.3	-1.3	-1.3	-1.3	-1.3	-1.3	-1.3	-1.3	-1.3	-0.7	-0.7	-0.7	-0.7
248	0	45	1	5.54	2.95	1.2	NA	2	1.3	1.5	1.7	1.7	1.5	1.7	1.7	1.5	1.7	1.5	1.5	1.5	1.7	1.3	1.7	1.5	1.7	1.3	1.3	1.5	-1.3	-1.3	-1.3	-1.3	-1.3	-1.3	-1.3	-1.3	-1.3	-1.3	-1.3	-1.3	-1.3	-1.3	-1.3	-1.3	-1.3	-1.3	-1.3	-1.3	-1.3
301	0	69	1	6.4	3.38	1	NA	2	1.3	2.1	1.9	1.9	1.9	1.7	1.9	1.9	2.1	1.9	1.7	1.9	1.9	1.7	2.1	2.1	1.7	1.9	2.1	1.7	-1.3	-1.3	-1.3	-1.3	-1.3	-1.3	-1.3	-1.3	-1.3	-1.3	-1.3	-1.3	-1.3	-1.3	-1.3	-1.3	-1.3	-1.3	-1.3	-1.3	-1.3
302	0	72	1	6.1	3.72	1	NA	2	0.1	1.1	1.1	1.5	1.3	1.5	1.5	1.5	1.5	1.5	1.3	1.3	1.5	9999	9999	-0.3	1.3	1.5	1.3	1.7	-1.3	-1.3	-1.3	-1.3	-1.3	-1.3	-1.3	-1.3	-1.3	-1.3	-1.3	-1.3	-1.3	-1.3	-1.3	-1.3	-1.3	-1.3	-1.3	-1.3	-1.3
303	0	79	1	4.68	3.24	1	NA	2	2.5	0.9	1.3	1.1	1.5	1.1	1.5	1.5	1.3	1.1	1.5	1.3	1.3	1.5	1.3	1.3	1.5	1.3	1.5	1.7	-1.3	-1.3	-1.3	-1.3	-1.3	-1.3	-1.3	-1.3	-1.3	-1.3	-1.3	-1.3	-1.3	-1.3	-1.3	-1.3	-1.3	-1.3	-1.3	-1.3	-1.3
304	0	73	0	6.4	3.47	1.2	NA	2	1.3	1.3	1.9	1.7	1.7	1.1	1.5	1.3	1.5	1.5	1.7	1.5	1.3	1.3	1.7	1.5	1.5	1.7	1.3	1.5	-1.3	-1.3	-1.3	-1.3	-1.3	-1.3	-1.3	-1.3	-1.3	-1.3	-1.3	-1.3	-1.3	-1.3	-1.3	-1.3	-1.3	-1.3	-1.3	-1.3	-1.3
305	0	76	0	3.71	2.43	1.2	NA	2	1.7	1.9	1.9	1.7	1.7	1.5	1.9	1.7	1.7	1.7	1.3	1.7	1.9	1.5	1.7	1.7	1.5	1.5	1.5	1.7	-1.3	-1.3	-1.3	-1.3	-1.3	-1.3	-1.3	-1.3	-1.3	-1.3	-1.3	-1.3	-1.3	-1.3	-1.3	-1.3	-1.3	-1.3	-1.3	-1.3	-1.3
306	0	81	0	4.3	2.78	1.2	NA	2	1.1	1.1	1.3	1.5	1.3	1.3	1.7	1.3	1.3	1.7	1.7	1.3	1.1	1.7	1.5	1.3	1.5	1.5	1.3	1.3	-1.3	-1.3	-1.3	-1.3	-1.3	-1.3	-1.3	-1.3	-1.3	-1.3	-1.3	-1.3	-1.3	-1.3	-1.3	-1.3	-1.3	-1.3	-1.3	-1.3	-1.3
101	1	63	0	2.52	2.52	1.2	-14.4	1	1.3	1.5	1.3	2.1	1.5	1.7	1.5	1.3	1.5	1.5	1.3	1.5	1.5	1.5	1.3	1.3	1.5	1.5	1.3	1.5	-1.3	-1.3	-1.3	-1.3	-1.3	-1.3	-1.3	-1.3	-1.3	-1.3	-1.3	-1.3	-0.9	-0.5	-0.5	-0.7	-0.9	-0.9	-0.7	-0.7	-0.7
102	1	77	0	3.95	3.16	1	-13.2	1	-1.3	0.9	1.3	0.9	0.9	0.9	0.9	1.1	0.9	0.9	1.1	1.1	1.1	1.1	1.1	0.9	0.7	0.9	0.9	1.1	-1.3	-1.3	-1.3	-1.3	-1.3	-1.3	-1.3	-1.3	-1.3	-1.3	-1.3	-1.3	-1.3	-1.1	-1.1	-1.1	-0.9	9999	-1.1	-1.1	-1.1
103	1	69	1	6.32	4.11	1.2	-5.4	1	1.3	1.3	1.3	9999	1.3	1.7	1.3	1.3	1.3	1.3	2.1	1.5	1.3	2.1	1.3	1.3	1.5	1.5	1.3	1.3	-1.3	-0.7	-0.7	9999	-0.9	9999	-1.1	-0.7	-0.5	-0.7	-0.7	-0.7	-1.1	-0.7	9999	9999	-0.7	-0.7	-0.7	-0.7	-0.5
104	1	73	0	4.41	3.04	1	-4.1	1	9999	1.3	1.3	1.3	1.3	1.3	1.3	1.3	1.3	1.3	1.5	1.3	1.3	1.3	1.5	1.3	1.3	1.3	1.3	1.3	-1.3	-1.3	-1.3	-1.3	-1.3	-1.3	-1.3	-1.3	-1.3	-0.9	9999	-0.7	-1.1	-0.7	9999	-0.7	-0.7	-0.7	-0.3	-0.5	-0.7
105	1	49	1	5.5	3.33	1	-12.5	1	1.3	1.5	1.5	1.5	1.5	1.7	1.7	1.7	1.5	1.5	1.9	1.9	1.7	1.3	1.5	1.5	1.5	1.5	1.3	1.5	-1.3	-1.3	-1.3	-1.3	-1.1	9999	-0.7	-1.1	9999	-0.7	-0.5	-0.7	-0.3	-0.3	-0.5	-0.3	-0.5	-0.3	-0.1	-0.3	-0.3
106	1	73	0	2.59	2.11	1	-14.4	1	1.3	1.5	1.7	9999	1.5	1.3	1.3	1.3	1.3	1.3	1.3	1.3	1.5	1.5	1.3	1.3	1.5	1.3	1.3	1.3	-1.3	-1.3	-1.3	-1.3	-1.3	-1.3	-1.3	-1.3	-1.3	-1.3	-1.3	-1.3	-0.9	-0.7	-0.3	-0.7	-0.7	-1.1	-0.7	9999	-0.7
109	1	75	0	2.72	2.21	1	-16.2	1	1.3	1.5	1.3	9999	1.5	1.5	1.5	1.3	1.5	1.3	1.3	1.3	1.5	1.3	1.3	1.5	1.5	1.5	1.3	1.5	-1.3	-1.3	-1.3	-1.3	-1.3	-1.3	-1.3	-1.3	-1.3	-1.3	-1.3	-1.3	-1.3	-1.3	-1.3	-1.3	-1.3	-1.3	-1.3	-1.3	-1.3
110	1	73	0	4.98	3.51	1	-19.3	1	1.3	1.3	1.3	1.3	1.3	1.3	1.3	1.3	1.3	1.3	1.3	1.3	1.5	1.5	1.5	1.5	1.5	1.5	1.5	1.5	-1.3	-1.3	-1.3	-1.3	-1.3	-1.3	-1.3	-1.3	-0.7	9999	-0.7	-0.7	-0.7	-0.9	9999	9999	9999	-0.7	-0.5	9999	-1.1
111	1	65	0	4.58	3.79	1.2	-18.6	1	1.3	1.7	1.7	1.5	1.5	1.5	2.1	1.5	1.7	1.7	2.1	1.7	1.7	1.5	1.7	1.5	1.5	1.9	1.5	1.7	-1.3	-1.3	-1.3	-1.3	-0.5	-0.7	-0.7	-0.9	-0.9	-1.1	-0.3	9999	-0.5	-0.5	-0.5	-0.7	-0.1	-0.5	-0.7	-0.5	-0.5
112	1	62	0	4	3.33	1.2	-15.3	1	1.5	9999	1.3	1.3	1.3	2.1	1.3	1.3	1.3	1.3	1.3	1.3	1.5	1.7	1.5	1.3	1.5	1.5	1.3	1.5	-1.3	-1.3	-1.3	-1.3	-1.3	-1.3	-1.3	-1.3	-1.3	-1.3	-0.3	-0.3	0.5	-0.3	-0.3	-0.1	-0.3	-0.5	-0.1	-0.7	-0.3
113	1	76	0	4.31	3.69	1	-13.7	1	0.5	0.9	0.9	0.9	0.9	0.9	1.1	0.9	1.1	0.9	0.9	0.9	0.9	0.9	0.9	0.9	0.9	0.9	0.9	0.9	-1.3	-1.3	-1.3	-1.3	-1.3	-1.3	-1.3	-1.3	-1.3	-1.3	-1.3	-1.3	-1.3	-1.3	-1.3	-1.3	-1.3	-1.3	-1.3	-1.1	-0.5
114	1	71	1	4.56	3.8	1	-21.7	1	1.5	1.3	1.3	1.3	1.5	1.3	1.3	1.5	1.3	1.3	1.3	1.5	2.1	1.5	1.3	1.3	1.7	1.3	1.3	1.3	-1.3	-1.3	-1.3	-1.3	-1.3	-1.3	-1.3	-1.3	-1.3	-1.3	-1.3	-1.3	-1.3	-1.3	-1.3	-1.3	-1.3	-1.3	-1.3	-1.3	-1.3
115	1	82	1	4.96	4	1	-26.8	1	1.1	1.1	1.1	1.3	1.3	1.3	1.7	1.3	1.3	2.1	1.3	1.7	1.5	1.3	1.3	1.3	1.3	1.3	1.7	1.3	-1.3	-1.3	-1.3	-1.3	-1.3	-1.3	-1.3	-1.3	-1.3	-1.3	-1.3	-1.3	-1.3	-1.3	-1.3	-1.3	-1.3	-1.3	-1.3	-1.3	-1.3
116	1	72	1	2.56	2.4	0.6	-28.2	1	0.9	9999	0.9	1.1	0.9	0.9	0.9	0.9	1.1	0.9	0.9	0.5	0.5	0.9	0.9	0.5	0.7	0.9	0.9	0.9	-1.3	-1.3	-1.3	-1.3	-1.3	-1.3	-1.3	-1.3	-1.3	-1.3	-1.3	-1.3	-1.3	-1.3	-1.3	-1.3	-1.3	-1.3	-1.3	-1.3	-1.3
117	1	73	1	3.5	2.47	1	-11	1	1.3	1.5	1.5	1.5	1.7	1.5	1.7	1.5	1.7	1.5	1.7	1.5	1.5	1.5	1.5	1.5	1.5	1.7	1.5	1.5	-1.3	-1.3	-1.3	-1.3	-1.3	-1.3	-1.3	-1.3	-1.3	-0.9	-1.1	-0.3	-0.9	-0.7	-0.7	-0.7	-0.7	-0.5	-0.5	-0.3	-0.7
118	1	46	0	4.66	3.04	1	-11	1	1.5	1.5	1.5	1.5	1.9	1.5	1.5	1.7	1.5	1.7	1.9	1.5	1.7	1.5	1.7	1.7	1.5	1.5	1.3	1.3	-1.3	-0.5	-0.1	-0.3	-0.5	-0.5	-0.5	-0.3	-0.3	-0.3	-0.1	0.1	-0.3	-0.3	-0.3	-0.3	-0.5	0.1	-0.3	-0.1	-0.3
120	1	74	0	3.25	2.6	1	-20.1	1	1.3	1.3	1.5	1.3	1.5	1.5	1.3	1.5	1.5	1.3	1.3	1.3	1.5	1.3	1.5	1.3	1.5	1.3	1.3	1.5	-1.3	-1.3	-1.3	-1.3	-1.3	-1.3	-1.3	-1.3	-1.3	-1.3	-1.3	-1.3	-1.3	-1.3	-1.3	-1.3	-1.3	-1.3	-1.3	-1.3	-1.3
121	1	67	0	3	2.37	1.2	-8.9	1	1.3	1.3	1.3	1.5	1.3	1.7	1.3	1.5	1.7	1.7	1.3	1.3	1.5	1.5	1.5	1.5	1.3	1.5	1.5	1.5	-1.3	-1.3	-1.3	-1.3	-1.3	-1.3	-1.3	-1.3	-1.3	-1.3	-1.3	-1.3	-1.3	-1.3	-1.3	-1.3	-1.3	-1.3	-1.3	-1.3	-1.3
124	1	59	1	2.65	2.55	1.2	-11.7	1	1.3	1.3	1.3	1.3	1.5	1.5	1.3	1.5	1.5	1.5	1.5	1.7	1.5	1.5	1.5	1.5	1.5	1.5	1.5	1.5	-1.3	-1.3	-1.3	-1.3	-1.3	-1.3	-1.3	-1.1	-1.1	-0.9	-0.7	-0.5	-0.7	-0.7	-0.7	-1.1	-0.7	-0.7	-1.1	-0.9	-0.7
125	1	65	0	3.28	2.71	1.2	-10.8	1	1.7	2.5	1.7	1.7	1.5	2.3	1.7	1.3	1.9	1.3	2.1	2.1	2.1	2.1	2.1	2.1	2.1	1.7	2.1	2.1	-1.3	-1.3	-0.3	-1.1	-0.7	-0.9	9999	-1.1	-1.1	9999	-0.9	-0.7	9999	-0.9	0.1	-0.7	-0.5	-0.9	-0.5	-0.7	-0.7
126	1	60	1	4.36	3.18	0.8	-13.8	1	1.3	1.3	1.3	1.3	1.3	1.3	1.5	1.3	1.3	1.3	1.3	1.3	1.3	1.3	1.5	1.5	1.5	1.3	1.3	1.5	-1.3	-1.3	-1.3	-1.3	-1.3	-1.3	-1.3	-1.3	-1.1	-0.7	-1.1	9999	-1.1	-0.7	9999	9999	-1.1	9999	9999	9999	9999
127	1	59	0	3.96	3.39	1.2	-9.7	1	1.3	1.5	1.5	1.3	1.5	1.7	1.5	1.7	1.5	1.5	1.5	1.5	1.7	1.5	1.5	1.9	1.5	1.5	1.5	1.5	-1.3	-1.3	-1.3	-1.3	-1.1	9999	-1.1	9999	9999	9999	9999	9999	9999	9999	-0.3	9999	-0.1	0.1	0.5	-0.3	-0.1
128	1	61	1	6.49	4.1	1	-5.9	1	1.3	1.5	1.5	1.5	1.7	1.7	1.5	1.5	1.9	2.1	1.7	1.5	1.9	1.5	1.5	9999	2.1	1.9	1.7	1.5	-1.3	-1.3	-1.3	-1.3	-1.3	-1.3	-1.3	-1.3	-0.5	-0.5	-0.5	-0.5	-0.3	-0.9	-0.7	-0.5	-0.5	-0.3	-0.3	-0.7	-0.3
101	1	63	0	2.67	2.45	1.2	-14.4	2	0.7	1.3	1.7	1.7	1.7	1.5	1.3	1.5	1.7	1.5	1.7	1.5	2.5	1.5	1.3	1.5	1.3	1.3	1.5	1.5	-1.3	-1.3	-1.3	-1.3	-1.3	-1.3	-1.3	-1.3	-1.3	-1.3	-1.3	-1.3	-1.3	-1.3	-1.3	-1.3	-1.3	-1.3	-1.3	-1.3	-1.3
102	1	77	0	4.71	3.04	1	-13.2	2	0.7	1.1	0.9	1.3	9999	1.3	1.1	0.9	1.1	1.3	0.9	1.1	0.9	0.9	0.9	1.3	1.1	1.1	1.1	1.1	-1.3	-1.3	-1.3	-1.3	-1.3	-1.3	-1.3	-1.3	-1.3	-1.3	-1.3	-1.3	-1.3	-1.3	-1.3	-1.3	-1.3	-1.3	-1.3	-1.3	-1.3
103	1	69	1	6.33	3.83	1.2	-5.4	2	-1.3	1.3	1.3	1.3	1.3	1.3	1.5	9999	1.3	1.5	1.3	1.1	0.9	1.1	1.1	1.1	1.1	1.1	1.7	1.3	-1.3	-1.3	-1.3	-1.3	-1.3	-1.3	-1.3	-1.3	-1.3	-1.3	-1.3	-1.3	-1.3	-1.3	-1.3	-1.3	-1.3	-1.3	-1.3	-1.3	-1.3
104	1	73	0	4.16	3.22	1	-4.1	2	-0.7	0.7	9999	1.5	1.3	1.5	1.3	1.3	1.3	1.3	1.3	1.5	1.5	1.5	1.3	1.5	1.5	1.5	1.9	1.9	-1.3	-1.3	-1.3	-1.3	-1.3	-1.3	-1.3	-1.3	-1.3	-1.3	-1.3	-1.3	-1.3	-1.3	-1.3	-1.3	-1.3	-1.3	-1.3	-1.3	-1.3
105	1	49	1	5.67	3.39	1	-12.5	2	0.5	0.9	1.3	1.9	1.7	1.7	1.7	1.7	1.9	1.9	1.3	1.5	1.9	1.7	1.7	1.7	1.7	1.7	1.7	1.7	-1.3	-1.3	-1.3	-1.3	-1.3	-1.3	-1.3	-1.3	-1.3	-1.3	-1.3	-1.3	-1.3	-1.3	-1.3	-1.3	-1.3	-1.3	-1.3	-1.3	-1.3
106	1	73	0	2.54	2.11	1	-14.4	2	1.1	1.1	1.1	1.3	1.5	1.5	1.7	1.9	1.5	1.9	1.5	1.7	1.5	1.5	1.7	1.7	1.7	1.5	1.5	1.5	-1.3	-1.3	-1.3	-1.3	-1.3	-1.3	-1.3	-1.3	-1.3	-1.3	-1.3	-1.3	-1.3	-1.3	-1.3	-1.3	-1.3	-1.3	-1.3	-1.3	-1.3
109	1	75	0	3.17	2.33	1	-16.2	2	1.5	1.3	1.3	1.5	1.7	1.3	1.3	1.7	1.1	1.5	1.3	9999	1.3	1.3	1.3	1.3	1.3	1.1	1.1	1.5	-1.3	-1.3	-1.3	-1.3	-1.3	-1.3	-1.3	-1.3	-1.3	-1.3	-1.3	-1.3	-1.3	-1.3	-1.3	-1.3	-1.3	-1.3	-1.3	-1.3	-1.3
110	1	73	0	5.17	3.32	1	-19.3	2	-1.3	1.3	1.3	1.3	0.9	1.5	1.7	1.3	1.3	1.7	1.7	1.7	1.5	1.3	1.7	1.5	1.5	1.5	1.7	1.5	-1.3	-1.3	-1.3	-1.3	-1.3	-1.3	-1.3	-1.3	-1.3	-1.3	-1.3	-1.3	-1.3	-1.3	-1.3	-1.3	-1.3	-1.3	-1.3	-1.3	-1.3
111	1	65	0	5	3.16	1	-18.6	2	1.3	1.7	1.5	1.7	1.3	1.9	1.7	9999	1.3	1.3	1.3	1.7	1.3	1.3	1.5	1.5	1.3	1.5	1.3	1.5	-1.3	-1.3	-1.3	-1.3	-1.3	-1.3	-1.3	-1.3	-1.3	-1.3	-1.3	-1.3	-1.3	-1.3	-1.3	-1.3	-1.3	-1.3	-1.3	-1.3	-1.3
112	1	62	0	4.05	3.33	1.2	-15.3	2	1.3	1.3	1.3	1.7	1.7	1.5	1.3	1.5	1.3	1.7	1.3	1.3	1.3	1.3	1.3	1.3	1.3	1.3	1.3	1.5	-1.3	-1.3	-1.3	-1.3	-1.3	-1.3	-1.3	-1.3	-1.3	-1.3	-1.3	-1.3	-1.3	-1.3	-1.3	-1.3	-1.3	-1.3	-1.3	-1.3	-1.3
113	1	76	0	4.5	3.55	0.8	-13.7	2	-1.3	0.3	1.1	2.1	0.7	0.7	0.9	0.9	0.9	0.7	0.9	0.7	0.7	0.7	0.9	0.9	0.9	0.9	0.7	0.9	-1.3	-1.3	-1.3	-1.3	-1.3	-1.3	-1.3	-1.3	-1.3	-1.3	-1.3	-1.3	-1.3	-1.3	-1.3	-1.3	-1.3	-1.3	-1.3	-1.3	-1.3
114	1	71	1	4.38	3.08	1	-21.7	2	-1.3	2.7	1.5	1.3	1.5	1.3	1.3	1.7	1.5	1.5	1.3	1.5	1.5	1.3	1.3	1.3	1.3	1.3	1.3	1.7	-1.3	-1.3	-1.3	-1.3	-1.3	-1.3	-1.3	-1.3	-1.3	-1.3	-1.3	-1.3	-1.3	-1.3	-1.3	-1.3	-1.3	-1.3	-1.3	-1.3	-1.3
115	1	82	1	4.52	3.58	1	-26.8	2	-1.3	1.3	9999	9999	-0.1	1.5	1.7	1.3	1.3	1.3	1.5	1.3	1.3	1.3	1.3	1.3	1.5	1.3	1.3	1.3	-1.3	-1.3	-1.3	-1.3	-1.3	-1.3	-1.3	-1.3	-1.3	-1.3	-1.3	-1.3	-1.3	-1.3	-1.3	-1.3	-1.3	-1.3	-1.3	-1.3	-1.3
116	1	72	1	2.62	2.3	0.6	-28.2	2	0.7	9999	0.7	0.9	1.1	1.1	1.5	1.3	1.5	1.3	1.3	1.3	1.3	1.3	1.3	1.3	1.3	1.1	9999	1.1	-1.3	-1.3	-1.3	-1.3	-1.3	-1.3	-1.3	-1.3	-1.3	-1.3	-1.3	-1.3	-1.3	-1.3	-1.3	-1.3	-1.3	-1.3	-1.3	-1.3	-1.3
117	1	73	1	3.52	2.52	1	-11	2	1.1	9999	1.3	1.3	1.3	1.3	1.5	1.3	1.5	1.5	1.3	1.5	1.5	1.5	1.5	1.5	1.5	1.9	1.3	1.7	-1.3	-1.3	-1.3	-1.3	-1.3	-1.3	-1.3	-1.3	-1.3	-1.3	-1.3	-1.3	-1.3	-1.3	-1.3	-1.3	-1.3	-1.3	-1.3	-1.3	-1.3
118	1	46	0	5.21	3.56	1	-11	2	1.9	9999	2.1	1.9	1.9	1.9	1.9	1.9	1.7	1.7	1.5	1.9	1.9	1.9	1.7	1.9	1.7	1.7	1.7	1.9	-1.3	-1.3	-1.3	-1.3	-1.3	-1.3	-1.3	-1.3	-1.3	-1.3	-1.3	-1.3	-1.3	-1.3	-1.3	-1.3	-1.3	-1.3	-1.3	-1.3	-0.9
120	1	74	0	3.71	3.03	1	-20.1	2	9999	1.3	1.5	1.7	1.7	1.7	1.3	1.5	1.5	1.5	1.5	1.5	1.5	1.3	1.3	1.3	1.5	1.3	1.3	1.7	-1.3	-1.3	-1.3	-1.3	-1.3	-1.3	-1.3	-1.3	-1.3	-1.3	-1.3	-1.3	-1.3	-1.3	-1.3	-1.3	-1.3	-1.3	-1.3	-1.3	-1.3
121	1	67	0	3.16	2.37	1.2	-8.9	2	0.9	1.3	1.5	1.5	1.7	1.7	1.7	2.1	1.7	1.9	1.7	2.1	1.7	1.7	1.3	1.9	1.7	1.3	1.5	1.3	-1.3	-1.3	-1.3	-1.3	-1.3	-1.3	-1.3	-1.3	-1.3	-1.3	-1.3	-1.3	-1.3	-1.3	-1.3	-1.3	-1.3	-1.3	-1.3	-1.3	-1.3
124	1	59	1	3.12	2.3	1.2	-11.7	2	1.1	1.3	1.1	1.3	1.1	1.3	1.3	1.3	1.3	1.3	1.3	1.5	1.5	1.3	1.3	1.1	1.1	1.1	1.1	1.1	-1.3	-1.3	-1.3	-1.3	-1.3	-1.3	-1.3	-1.3	-1.3	-1.3	-1.3	-1.3	-1.3	-1.3	-1.3	-1.3	-1.3	-1.3	-1.3	-1.3	-1.3
125	1	65	0	3.7	3.02	1.2	-10.8	2	1.7	1.3	9999	1.7	9999	2.1	1.9	1.9	2.1	1.9	1.9	1.7	1.7	1.7	2.1	1.7	1.7	1.7	1.7	1.9	-1.3	-1.3	-1.3	-1.3	-1.3	-1.3	-1.3	-1.3	-1.3	-1.3	-1.3	-1.3	-1.3	-1.3	-1.3	-1.3	-1.3	-1.3	-1.3	-1.3	-1.3
126	1	60	1	5.08	3.15	0.8	-13.8	2	0.9	1.3	1.7	1.7	1.7	1.7	1.7	1.3	1.3	1.3	1.3	1.5	1.7	1.3	1.3	1.5	1.5	1.5	1.3	1.3	-1.3	-1.3	-1.3	-1.3	-1.3	-1.3	-1.3	-1.3	-1.3	-1.3	-1.3	-1.3	-1.3	-1.3	-1.3	-1.3	-1.3	-1.3	-1.3	-1.3	-1.3
127	1	59	0	4.09	2.94	1.2	-9.7	2	1.3	1.3	1.5	1.3	2.1	1.3	1.5	1.5	1.5	1.3	1.5	1.7	1.3	1.7	1.3	1.5	1.5	1.3	1.3	1.3	-1.3	-1.3	-1.3	-1.3	-1.3	-1.3	-1.3	-1.3	-1.3	-1.3	-1.3	-1.3	-1.3	-1.3	-1.3	-1.3	-1.3	-1.3	-1.3	-1.3	-1.3
128	1	61	1	6.74	4.1	1	-5.9	2	0.7	1.9	1.9	2.1	1.7	1.9	1.7	1.7	1.9	1.7	1.7	1.9	1.7	1.7	1.9	1.5	1.7	1.7	1.3	1.7	-1.3	-1.3	-1.3	-1.3	-1.3	-1.3	-1.3	-1.3	-1.3	-1.3	-1.3	-1.3	-1.3	-1.3	-1.3	-1.3	-1.3	-1.3	-1.3	-1.3	-1.3
[truncated: 39 more columns]
